# Supplementary material for: Keggin type heteropolyacid-mediated novel green protocol for the synthesis of porphyrins
Source: Royal Society of Chemistry journal article supplement (doi:10.1039/d3nj01048a), 2023-01-01
Supplement: d3nj01048a1.pdf [file d3nj01048a1.pdf]

## Supplementary Information

### Keggin type heteropolyacid-mediated novel green protocol for the synthesis of porphyrins

Gopika Jagannivasan<sup>a</sup>, Arun R<sup>a</sup>, Mohit Kumar<sup>c</sup>, Challapalli Subrahmanyam<sup>c</sup>, Sebastian Nybin Remello<sup>a,b</sup>, Suja Haridas<sup>a,b\*</sup>

<sup>a</sup> Department of Applied Chemistry, Cochin University of Science and Technology, Kochi, Kerala, India.

<sup>b</sup> Inter University Centre for Nanomaterials and Devices, Cochin University Science and Technology, Kochi, Kerala, India .

<sup>c</sup> Department of Chemistry, Indian Institute of Technology Hyderabad, Kandi, Sangareddy, Telangana-502285

\* [sujaharidas@cusat.ac.in](mailto:sujaharidas@cusat.ac.in)

#### Table of Contents:

##### 1. Supplementary Figure

**Fig.S1.** EDX of Heteropolyacids- HPW, HPV<sub>1</sub>W, HPV<sub>2</sub>W and HPV<sub>3</sub>W

**Fig. S2.** MALDI TOF Spectra of representative samples

**Fig. S3.** Porphyrin yield monitored as a function of time

**Fig.S4.** TG-DTG curves of HPV<sub>1</sub>W, HPV<sub>2</sub>W and HPV<sub>3</sub>W

##### 2. Supplementary Table

**Table S1.** Comparative evaluation of catalytic activity.

**Table S2.** Influence of temperature on porphyrin yield

**Table S3.** Screening of Catalytic activity of various HPAs

##### 3. Supplementary Data

**S1 :** <sup>1</sup>H & <sup>13</sup>C NMR of synthesized porphyrins

## 1. Supplementary Figure

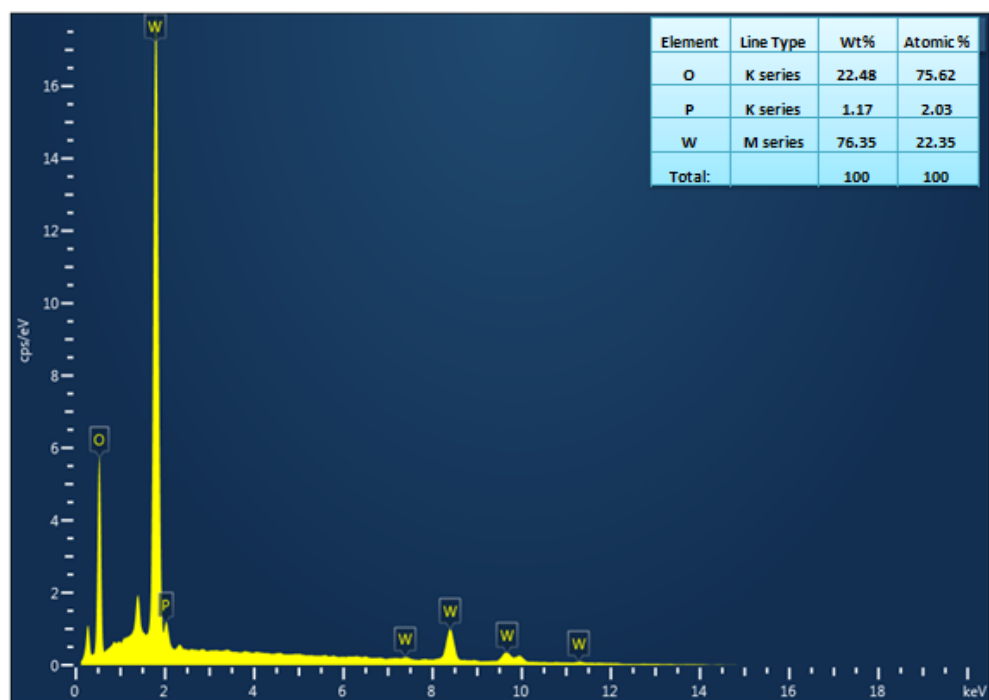

**Fig. S1 (a)** EDX of Heteropolyacid, HPW

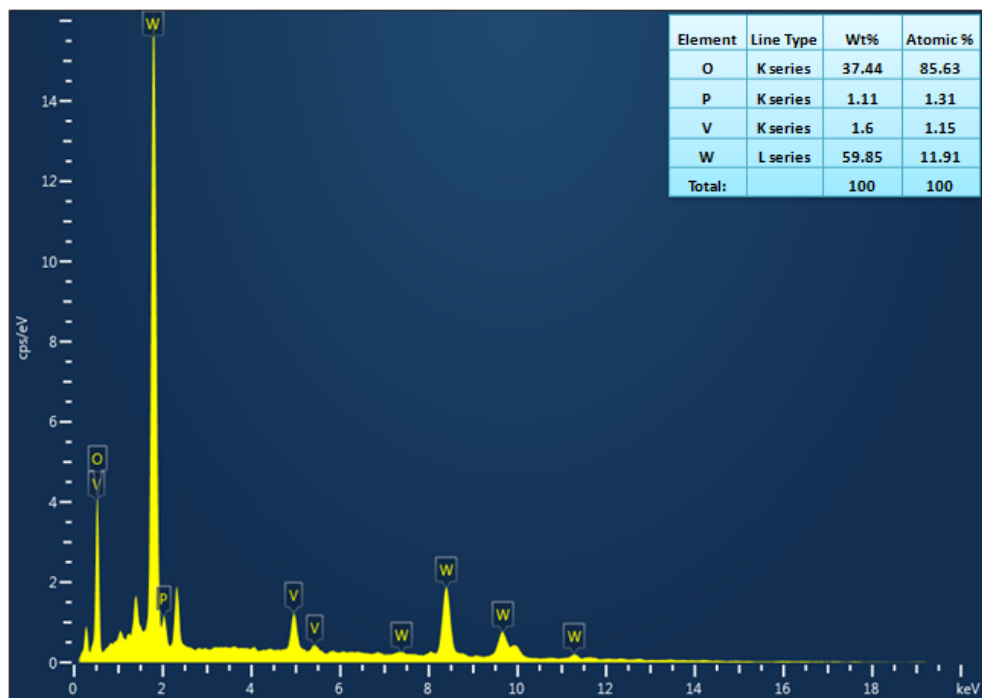

Fig. S1 (b) EDX of Heteropolyacid, HPV<sub>1</sub>W

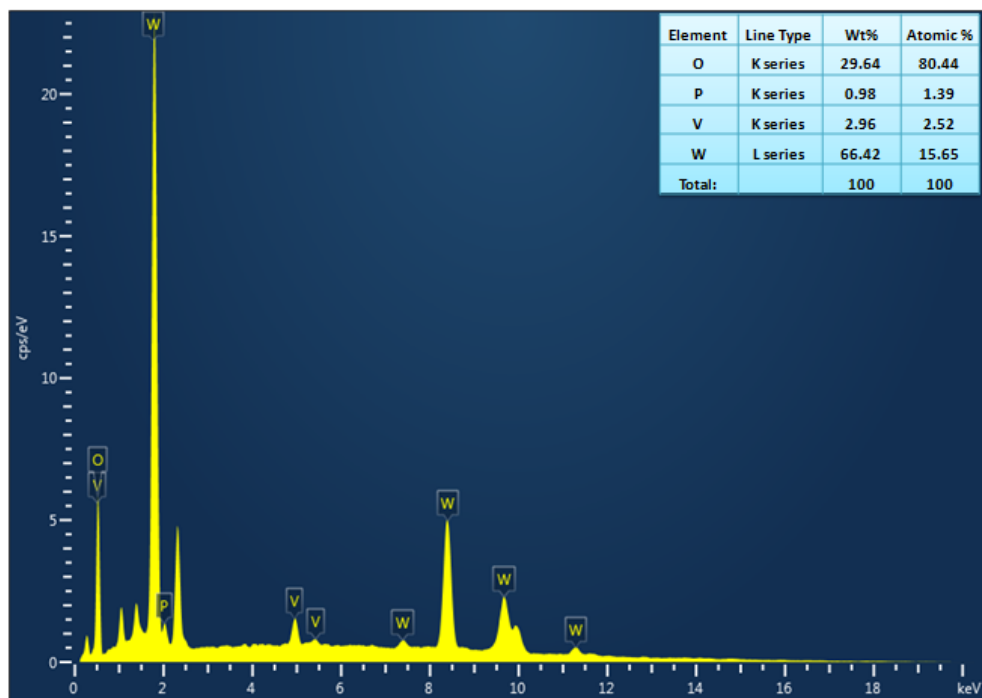

Fig. S1 (c) EDX of Heteropolyacid, HPV<sub>2</sub>W

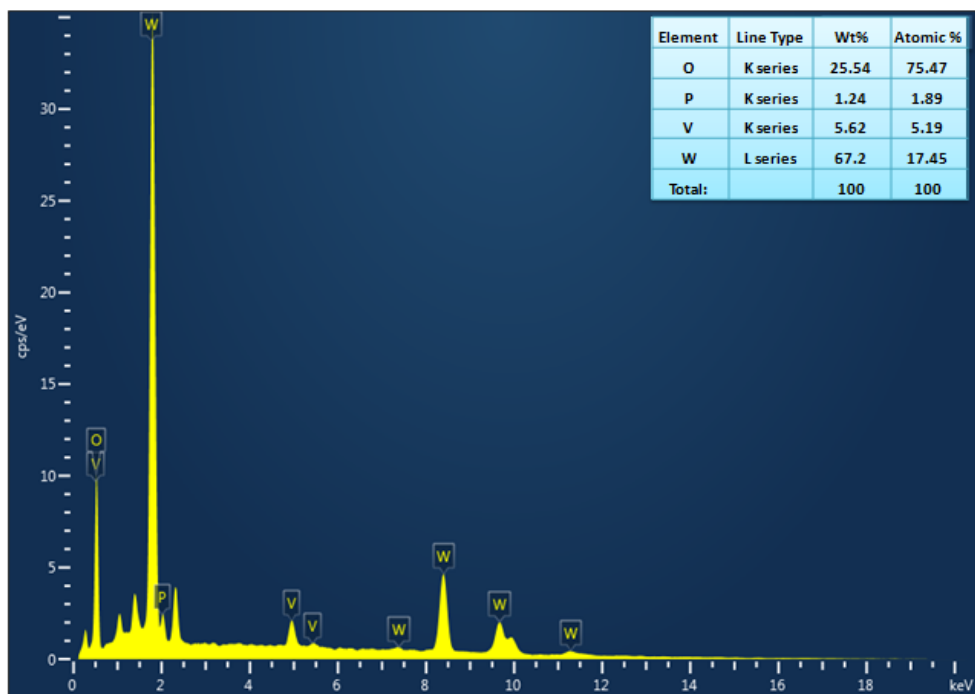

Fig. S1 (d) EDX of Heteropolyacid, HPV<sub>3</sub>W

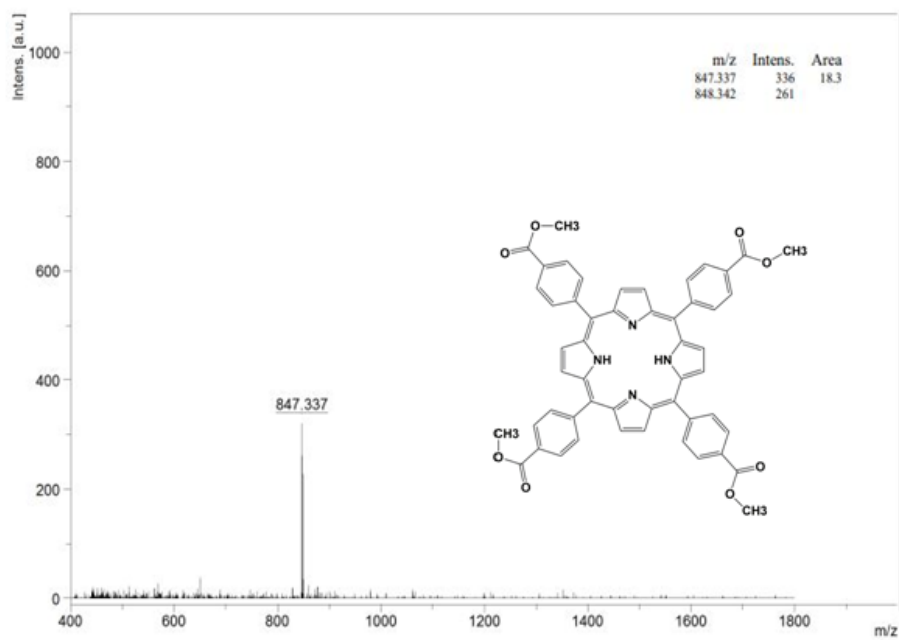

Fig. S2 (a) MALDI-TOF Mass spectrum of meso-Tetrakis(4-methoxycarbonylphenyl)porphyrin

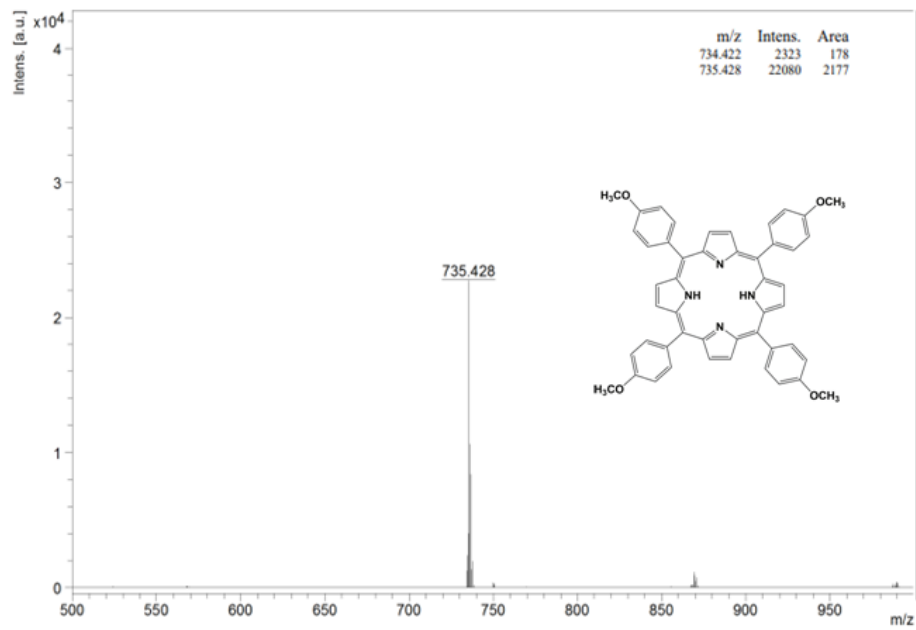

Fig. S2 (b) MALDI-TOF Mass spectrum of meso-Tetrakis(4-methoxyphenyl)porphyrin

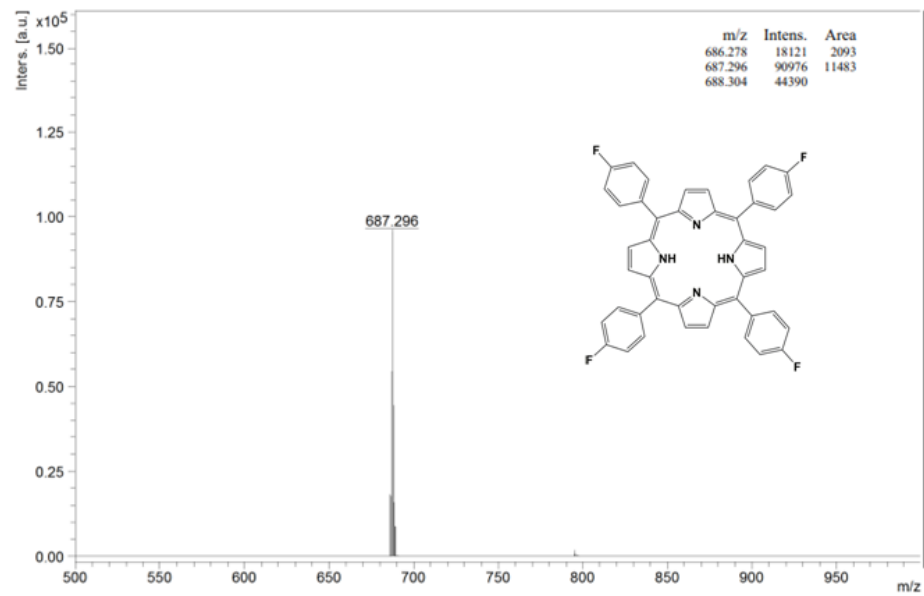

Fig. S2 (c) MALDI-TOF Mass spectrum of meso-tetra(4-fluorophenyl)porphyrin

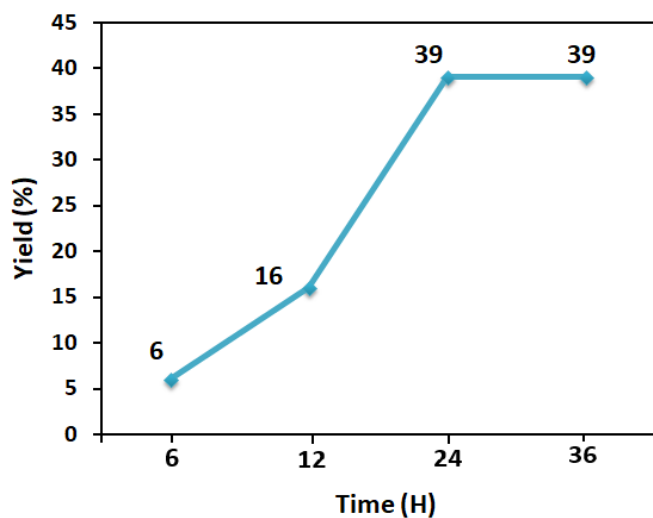

**Fig. S3** Porphyrin yield monitored as a function of time

Reaction conditions: 1 mmol methyl 4-formylbenzoate, 1 mmol pyrrole, 10 mL CH<sub>3</sub>CN, 0.5 mol% catalyst, 70 °C, Autoclave.

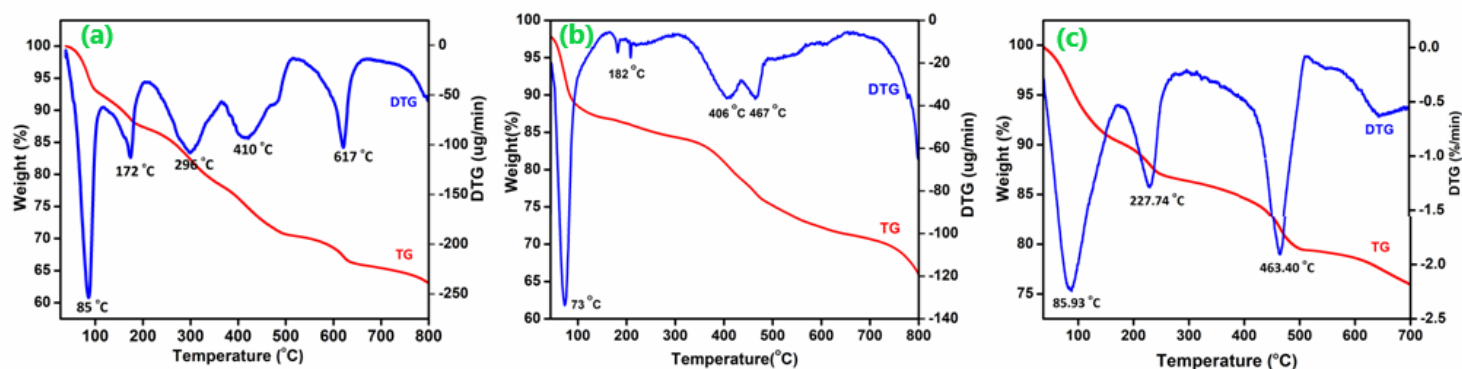

**Fig. S4.** TG-DTG Curves of (a) HPV<sub>1</sub>W (b) HPV<sub>2</sub>W (c) HPV<sub>3</sub>W

## 2. Supplementary Table

**Table S1** : Comparative evaluation of catalytic activity

| Si. No. | Aldehyde | Solvent  | Reaction Conditions                                                                                          | Yield (%) | Ref |
|---------|----------|----------|--------------------------------------------------------------------------------------------------------------|-----------|-----|
| 1       |          | Pyridine | Solvent: Sealed tubes at 220 °C for 48 Hr.                                                                   | 10%       | [2] |
| 2       |          |          | Catalyst: BF <sub>3</sub> -etherate (0.3Mm), Co catalyst: TFA (15 mM)<br>Oxidant: DDQ in toluene, Time: 4 Hr | 50-55%    | [9] |

|    |              |                                     |                                                                                                                                                                                                                                                |                                                                                                   |      |                  |
|----|--------------|-------------------------------------|------------------------------------------------------------------------------------------------------------------------------------------------------------------------------------------------------------------------------------------------|---------------------------------------------------------------------------------------------------|------|------------------|
| 3  | Benzaldehyde | Dichloromethane                     | Catalyst: $10^{-2}$ M $\text{BF}_3\text{-O}(\text{Et})_3$<br>0.1 eqv. NaCl or 0.0031 eqv. $\text{Bu}_3\text{BzINCl}$ ,                                                                                                                         | 50%                                                                                               | [10] |                  |
| 4  |              | Dichloromethane                     | Acid: $\text{BF}_3$ -etherate/NaCl (1/250) mM, Oxidant-DDQ, Time-1 Hr.                                                                                                                                                                         | 58%                                                                                               | [11] |                  |
| 5  |              | Dichloromethane                     | Catalyst: $\text{CF}_3\text{SO}_2\text{Cl}$ , $\text{N}_2$ atmosphere, Aerated at 39 °C for 4 Hr.                                                                                                                                              | 62%                                                                                               | [13] |                  |
| 7  |              |                                     | Acid: Toluenesulfonic acid, 1:1 molar ratio of pyrrole and benzaldehyde (3.73 mmol) and Toluenesulfonic acidground in Retsch MM 200 MILL at a frequency of 25 Hz. Pink solid dissolved in 50 mL $\text{CHCl}_3$ , Oxidant: DDQ, 2 Hr stirring. | 28%                                                                                               | [16] |                  |
| 8  |              |                                     | High temperature gas phase conditions: Temperature controlled sand bath, 200 °C, Dioxygen as Oxidant                                                                                                                                           | 23%                                                                                               | [18] |                  |
| 9  |              |                                     | High temperature gas phase conditions: Gas tight rubber septem, Temperature controlled sand bath, Dioxygen as Oxidant, Catalyst: Benzoic acid, 200 °C                                                                                          | 32%                                                                                               | [19] |                  |
| 10 |              |                                     | Nitrobenzene oxidant,<br>Microwave irradiation-650W, 200 °C, 3 bar internal pressure, 5-10 min.                                                                                                                                                | 35%                                                                                               | [23] |                  |
| 11 |              |                                     | Catalyst: 0.2 eqv. of $\text{I}_2$ , Reagent concentration: $10^{-2}$ mol/L, Microwave irradiation, Solvent: $\text{CH}_2\text{Cl}_2$ , Oxidant: <i>p</i> -Chloranil (0.75 eqv).                                                               | 35-47%                                                                                            | [25] |                  |
| 12 |              |                                     | Nitrobenzene oxidant,<br>Microwave irradiation, 5 min, 640 W.                                                                                                                                                                                  | 20%                                                                                               | [26] |                  |
| 13 |              |                                     | Acid ionic liquid ( $\text{R-SO}_3\text{H}$ - 3 mL), Oxidant: DDQ (14.5 mM), Quencher: Triethylamine, RT.                                                                                                                                      | 43%                                                                                               | [28] |                  |
| 14 |              |                                     | Ionic liquid:<br>[ $\text{HC}_4\text{im}$ ][ $\text{CF}_3\text{CO}_2$ ]                                                                                                                                                                        | Reactants: 280 mM, 120 °C, 1 Hr                                                                   | 15%  | [30]             |
| 15 |              |                                     | Ionic liquid:<br>[ $\text{HC}_1\text{im}$ ][ $\text{CF}_3\text{CO}_2$ ]                                                                                                                                                                        | Reactants: 280 mM, 120 °C, 1 Hr.                                                                  | 8%   | [31]             |
| 16 |              |                                     | Acetonitrile                                                                                                                                                                                                                                   | Catalyst: $\text{H}_4\text{PVW}_{11}\text{O}_{40}$ , Autoclaving at 70 °C.                        | 20%  | <b>This Work</b> |
| 17 |              |                                     | Dichloromethane                                                                                                                                                                                                                                | Catalyst: $\text{CF}_3\text{SO}_2\text{Cl}$ , $\text{N}_2$ atmosphere, Aerated at 39 °C for 3 Hr. | 56%  | [13]             |
| 18 |              | Propionic acid: glacial acetic acid | Nitrobenzene oxidant, Reflux for 2 Hr.                                                                                                                                                                                                         | 50%                                                                                               | [14] |                  |
| 19 |              |                                     | Acid: Toluenesulfonic acid, 1:1 molar ratio of pyrrole and 4-chloro Benzaldehyde (3.73 mmol) and Toluenesulfonic acidground in Retsch MM                                                                                                       |                                                                                                   |      |                  |

|    |                       |                 |                                                                                                                                                                                                                                                            |      |                  |
|----|-----------------------|-----------------|------------------------------------------------------------------------------------------------------------------------------------------------------------------------------------------------------------------------------------------------------------|------|------------------|
|    | 4-Chlorobenzaldehyde  |                 | 200 MILL at a frequency of 25 Hz. Pink solid dissolved in 50 mL CHCl <sub>3</sub> , Oxidant: DDQ, 2 Hr stirring.                                                                                                                                           | 20%  | [16]             |
| 20 |                       |                 | High temperature gas phase conditions:<br>Temperature controlled sand bath, 200 °C,<br>Dioxygen as Oxidant                                                                                                                                                 | 10%  | [18]             |
| 21 |                       |                 | High-temperature gas-phase conditions: Gas-tight rubber septum, Temperature controlled sand bath, Dioxygen as Oxidant, Catalyst: Benzoic acid, 200 °C.                                                                                                     | 25%  | [19]             |
| 22 |                       | Propionic acid  | Microwave irradiation 3 -5 min, extraction with CH <sub>2</sub> Cl <sub>2</sub> (100 mL).                                                                                                                                                                  | 7%   | [22]             |
| 23 |                       | propionic acid  | 10 mmol pyrrole (3.5 mL)+ Nitrobenzene (1.5 mL), microwave irradiation, 5 min, 640 W                                                                                                                                                                       | 21%  | [26]             |
| 24 |                       | Dichloromethane | Catalyst: activated FSM-16, N <sub>2</sub> atmosphere, Oxidant- <i>p</i> -chloranil, Reflux 1-2 Hr.                                                                                                                                                        | 7%   | [34]             |
| 25 |                       | Acetonitrile    | Catalyst: H <sub>4</sub> PVW <sub>11</sub> O <sub>40</sub> , Autoclaving 70 °C.                                                                                                                                                                            | 27%  | <b>This Work</b> |
| 26 | 4-Fluorobenzaldehyde  |                 | Acid: Toluenesulfonic acid, 1:1 molar ratio of pyrrole and 4-Fluoro benzaldehyde (3.73 mmol) and Toluenesulfonic acid ground in Retsch MM 200 MILL at a frequency of 25 Hz. Pink solid dissolved in 50 mL CHCl <sub>3</sub> , Oxidant: DDQ, 2 Hr stirring. | 9.7% | [16]             |
| 27 |                       | Acetonitrile    | Catalyst: H <sub>4</sub> PVW <sub>11</sub> O <sub>40</sub> , Autoclaving 70 °C.                                                                                                                                                                            | 29%  | <b>This Work</b> |
| 28 | 4-Methoxybenzaldehyde | Dichloromethane | Catalyst: 10 <sup>-2</sup> M BF <sub>3</sub> -O(Et) <sub>3</sub><br>0.1 eqv. NaCl or 0.0031 eqv. Bu <sub>3</sub> BzINCl,                                                                                                                                   | 22%  | [10]             |
| 29 |                       | Propionic acid  | Oxidizing agent : Nitrobenzene (15 ml), 120 °C, 1 Hr                                                                                                                                                                                                       | 45%  | [12]             |
| 30 |                       |                 | High temperature gas phase conditions:<br>Temperature controlled sand bath, 200 °C,<br>Dioxygen as Oxidant                                                                                                                                                 | 20%  | [18]             |
| 31 |                       |                 | High temperature gas phase conditions: Gas tight rubber septem, Temperature controlled sand bath, Dioxygen as Oxidant, Catalyst: Benzoic acid, 200 °C                                                                                                      | 25%  | [19]             |
| 32 |                       |                 | Catalyst: Activated charcoal treated with conc. nitric acid (68%), Temperature Controlled Sand Bath, 200 °C, 1 Hr.                                                                                                                                         | 33%  | [20]             |
|    |                       |                 | Reactants: 0.1 mol pyrrole, Microwave irradiation                                                                                                                                                                                                          |      |                  |



|    |                         |                                                                         |                                                                                                                                                                                                                                                       |              |                  |
|----|-------------------------|-------------------------------------------------------------------------|-------------------------------------------------------------------------------------------------------------------------------------------------------------------------------------------------------------------------------------------------------|--------------|------------------|
| 33 |                         | Propionic acid                                                          | 3 -5 min, Extraction with CH <sub>2</sub> Cl <sub>2</sub> (100 mL).                                                                                                                                                                                   | 15%          | [22]             |
| 34 |                         | Ionic liquid:<br>[HC <sub>4</sub> im][CF <sub>3</sub> CO <sub>2</sub> ] | Reactants : 280 mM, 120 °C, 1 Hr.                                                                                                                                                                                                                     | 6.7%         | [30]             |
| 35 |                         | Dichloromethane                                                         | Catalyst: activated FSM-16, N <sub>2</sub> atmosphere,<br>Oxidant- <i>p</i> -chloranil, Reflux 1-2 Hr.                                                                                                                                                | Trace amount | [34]             |
| 36 |                         | Acetonitrile                                                            | Catalyst: H <sub>4</sub> PVW <sub>11</sub> O <sub>40</sub> , Autoclaving at 70 °C.                                                                                                                                                                    | 12%          | <b>This Work</b> |
| 37 | 4-Formylbenzoic acid    | Propionic acid                                                          | Reactants: 0.24 M Pyrrole, Methanol/Pyridine,<br>Refluxing Condition, 2 Hr.                                                                                                                                                                           | 34%          | [5]              |
| 38 |                         | Acetonitrile                                                            | Catalyst: H <sub>4</sub> PVW <sub>11</sub> O <sub>40</sub> , Autoclaving at 70 °C.                                                                                                                                                                    | 26%          | <b>This Work</b> |
| 39 | Methyl 4-formylbenzoate |                                                                         | High temperature gas phase conditions: Gas tight rubber septum, Temperature controlled sand bath, Dioxygen as Oxidant, Catalyst: Benzoic acid, 200 °C.                                                                                                | 19%          | [19]             |
| 40 |                         | Acetonitrile                                                            | Catalyst: H <sub>4</sub> PVW <sub>11</sub> O <sub>40</sub> , Autoclaving 70 °C.                                                                                                                                                                       | 39%          | <b>This Work</b> |
| 41 | 1-Naphthaldehyde        |                                                                         | Acid: Toluenesulfonic acid, 1:1 molar ratio of pyrrole and 1-Naphthaldehyde (3.73 mmol) and Toluenesulfonic acid ground in Retsch MM 200 MILL at a frequency of 25 Hz. Pink solid dissolved in 50 mL CHCl <sub>3</sub> , Oxidant: DDQ, 2 Hr stirring. | 9.7%         | [16]             |
| 42 |                         | Acetonitrile                                                            | Catalyst: H <sub>4</sub> PVW <sub>11</sub> O <sub>40</sub> , Autoclaving 70 °C.                                                                                                                                                                       | 14%          | <b>This Work</b> |

**Table S2** Influence of temperature on porphyrin yield

| Entry | Temperature (°C) | Yield (%) |
|-------|------------------|-----------|
| 1.    | 50               | 15        |
| 2.    | 60               | 23        |
| 3.    | 70               | 39        |
| 4.    | 80               | 27        |

*Reaction conditions: 1 mmol methyl 4-formylbenzoate, 1 mmol pyrrole, 10 mL CH<sub>3</sub>CN, 0.5 mol% catalyst, Autoclave*

**Table S3** Screening the catalytic activity of various HPAs

| Entry | HPA                | Yield (%) |
|-------|--------------------|-----------|
| 1.    | HPW                | 10        |
| 2.    | HPV <sub>1</sub> W | 39        |
| 3.    | HPV <sub>2</sub> W | 15        |
| 4.    | HPV <sub>3</sub> W | 18        |

Reaction conditions: 1 mmol methyl 4-formylbenzoate,  
1 mmol pyrrole, 10 mL CH<sub>3</sub>CN, 0.5 mol% catalyst, 70 °C, Autoclave

### 3. Supplementary Data

#### S1 : <sup>1</sup>H & <sup>13</sup>C NMR of synthesized porphyrins

Tetraphenylporphyrin: <sup>1</sup>H NMR (400 MHz, CDCl<sub>3</sub>): δ (ppm) 8.86 (s, 8H), 8.22 (m, 8H), 7.77 (m, 12H), -2.75 (s, 2H, NH); <sup>13</sup>C NMR (101 MHz, CDCl<sub>3</sub>): δ (ppm) 142.28, 134.61, 127.82, 126.80, 120.25. [1, 2, 3]

meso-Tetra(4-chlorophenyl)porphyrin: <sup>1</sup>H NMR (400 MHz, CDCl<sub>3</sub>): δ (ppm) 8.83 (s, 8H), 8.13 (d, 8H), 7.73 (d, 8H), -2.88 (s, 2H, NH); <sup>13</sup>C NMR (101 MHz, CDCl<sub>3</sub>): δ (ppm) 140.44, 135.58, 134.48, 127.13, 119.07. [1]

meso-Tetrakis(4-carboxyphenyl)porphyrin: <sup>1</sup>H NMR (400 MHz, DMSO): 10.03 (s, 4H, COOH), 8.83 (s, 8H), 8.38 (d, 8H), 8.32 (d, 8H), -2.93 (s, 2H, NH); <sup>13</sup>C NMR (101 MHz, DMSO): δ (ppm) 173.06, 151.52, 140.33, 136.58, 133.72, 125.42. [4]

meso-Tetrakis(4-methoxycarbonylphenyl)porphyrin: <sup>1</sup>H NMR (400 MHz, CDCl<sub>3</sub>): δ (ppm) 8.81 (s, 8H), 8.43 (d, 8H), 8.27 (d, 8H), 4.10 (s, 12H), -2.83 (s, 2H, NH); <sup>13</sup>C NMR (101 MHz, CDCl<sub>3</sub>): δ (ppm) 167.34, 146.70, 134.61, 129.84, 128.09, 119.48, 52.59, 29.80, 27.34. [1]

meso-Tetrakis(4-methoxyphenyl)porphyrin: <sup>1</sup>H NMR (400 MHz, CDCl<sub>3</sub>): δ (ppm) 8.82 (s, 8H), 8.13 (d, *J* = 8.0 Hz, 8H), 7.27 (d, *J* = 8.0 Hz, 8H), 4.11 (s, 12H), -2.77 (s, 2H, NH) [1]

meso-Tetra(4-fluorophenyl)porphyrin: <sup>1</sup>H NMR (400 MHz, CDCl<sub>3</sub>): δ (ppm) 8.84 (s, 8H), 8.17 (s, 8H), 7.47 (s, 8H), -2.81 (s, 2H, NH). [5]

meso-Tetrakis(2,5-dimethylphenyl)porphyrin: <sup>1</sup>H NMR (400 MHz, CDCl<sub>3</sub>): δ (ppm) 8.67 (s, 8H), 7.47 (d, 8H), 7.25 (s, 4H), 2.53 (s, 12 H), 1.98 (s, 12H), -2.66 (s, 2H, NH); <sup>13</sup>C NMR (101 MHz, CDCl<sub>3</sub>): δ (ppm) 141.42, 139.39, 136.64, 135.12, 133.35, 128.81, 119.01, 114.23, 29.47, 22.80, 14.29

meso-Tetrakis(4-ethynylphenyl)porphyrin: <sup>1</sup>H NMR (400 MHz, CDCl<sub>3</sub>): δ (ppm) 8.88 (s, 8H), 8.19 (d, 8H), 7.91 (d, 8H), 3.35 (s, 4H), -2.82 (s, 2H, NH); <sup>13</sup>C NMR (101 MHz, CDCl<sub>3</sub>): δ (ppm) 148.16, 139.87, 136.14, 134.57, 77.41

meso-Tetrakis(2-hydroxy-3,5-dichlorophenyl)porphyrin: <sup>1</sup>H NMR (400 MHz, DMSO): 9.87 (s, 4H, OH), 8.88 (s, 8H), 8.31 (s, 4H), 7.88 (s, 4H), -2.86 (s, 2H, NH); <sup>13</sup>C NMR (101 MHz, DMSO): δ (ppm) 197.01, 169.83, 137.77, 137.19, 135.46, 120.68, 119.34, 62.89, 61.19, 43

meso-Tetrakis(1-naphthyl)porphyrin: <sup>1</sup>H NMR (400 MHz, DMSO): 8.47 (s, 8H), 8.24 (m, 8H), 8.09 (d, 4H), 7.82 (m, 4H), 7.46 (m, 4H), 7.10 (m, 8H), -2.26 (s, 2H, NH). [6]

# Tetraphenylporphyrin:

## <sup>1</sup>H NMR Spectrum

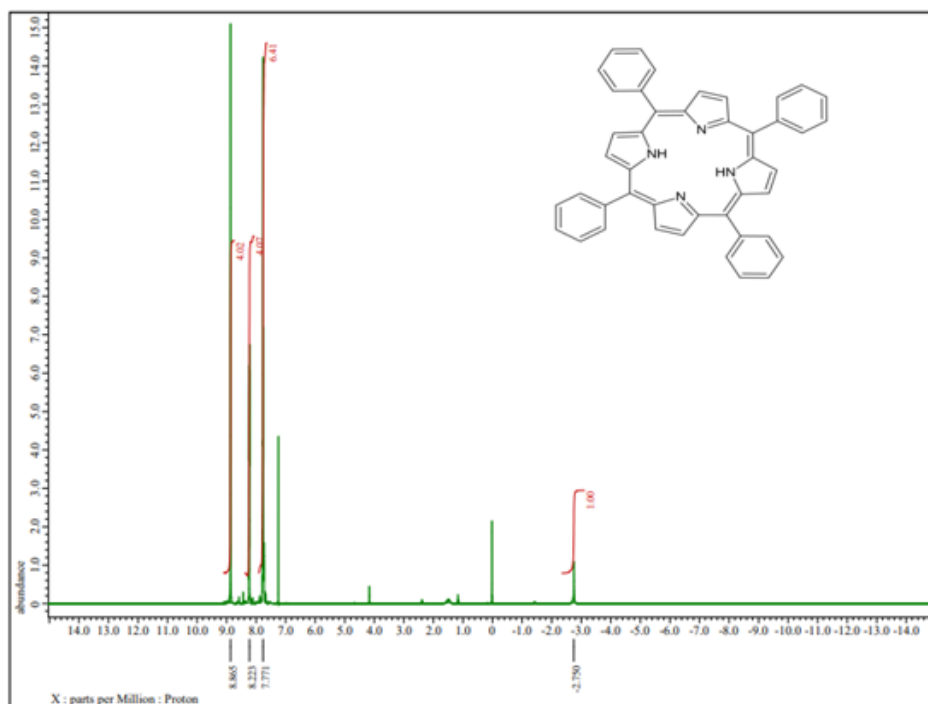

## <sup>13</sup>C NMR Spectrum

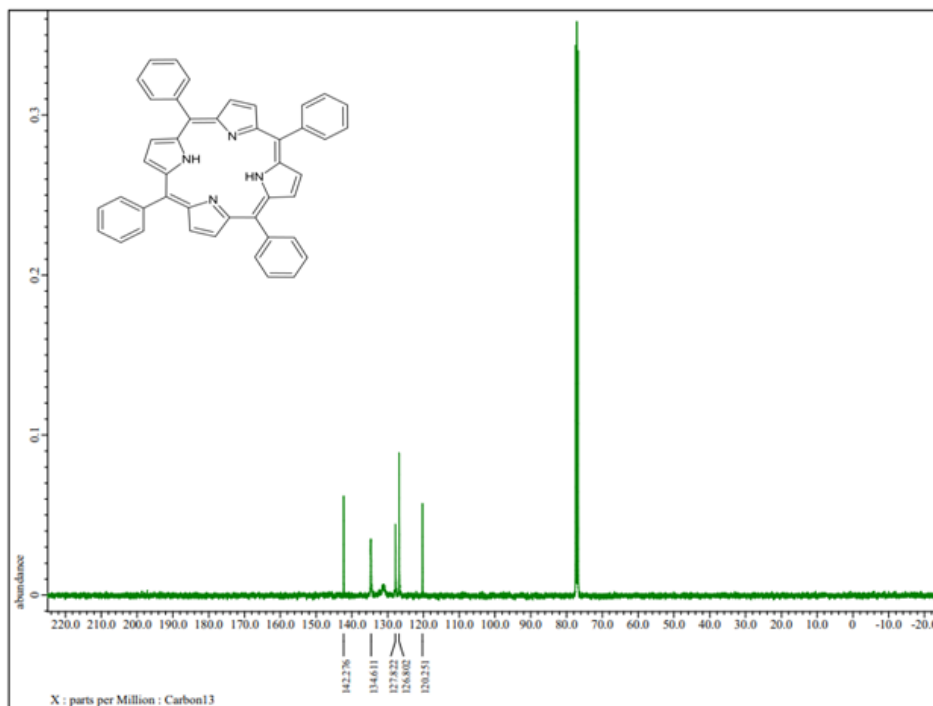

meso-Tetra(4-chlorophenyl)porphyrin:

$^1\text{H}$  NMR Spectrum

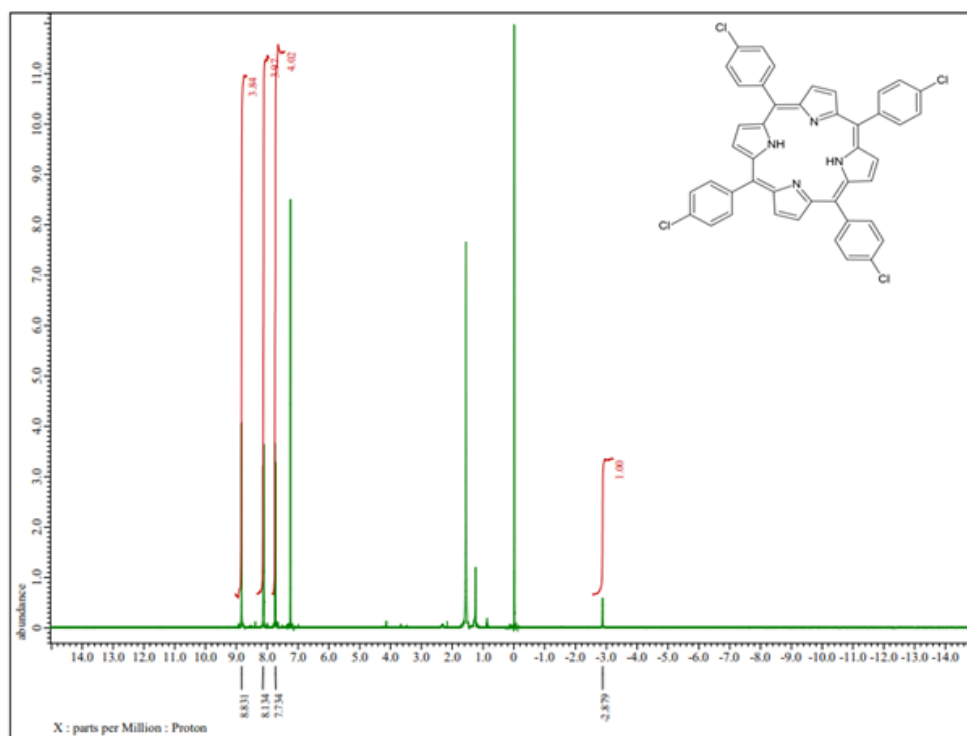

$^{13}\text{C}$  NMR Spectrum



<sup>13</sup>C NMR Spectrum

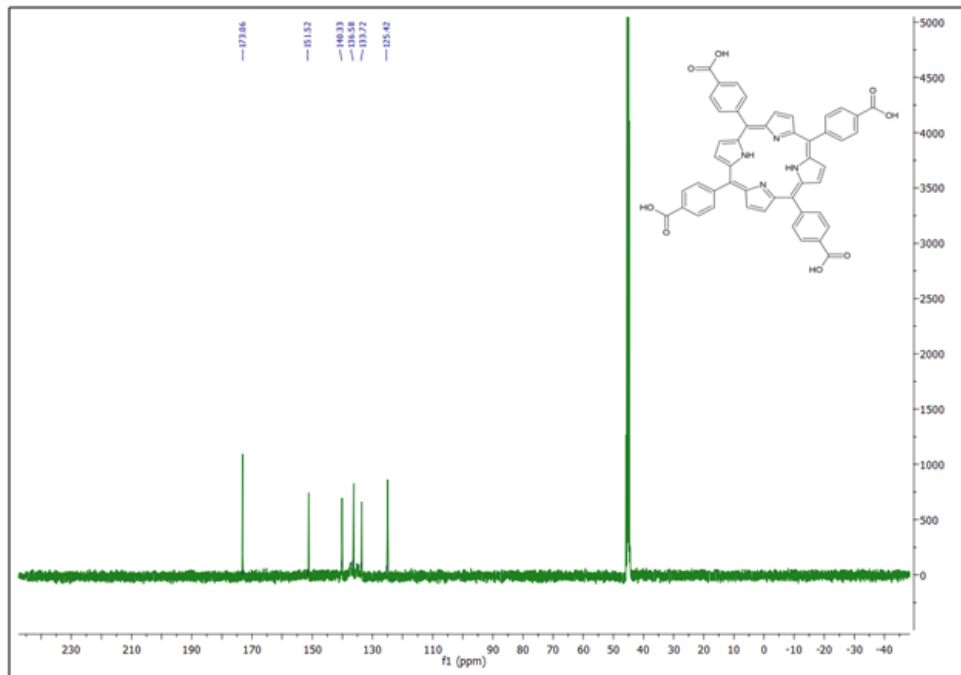

meso-Tetrakis(4-methoxycarbonylphenyl)porphyrin:

<sup>1</sup>H NMR Spectrum

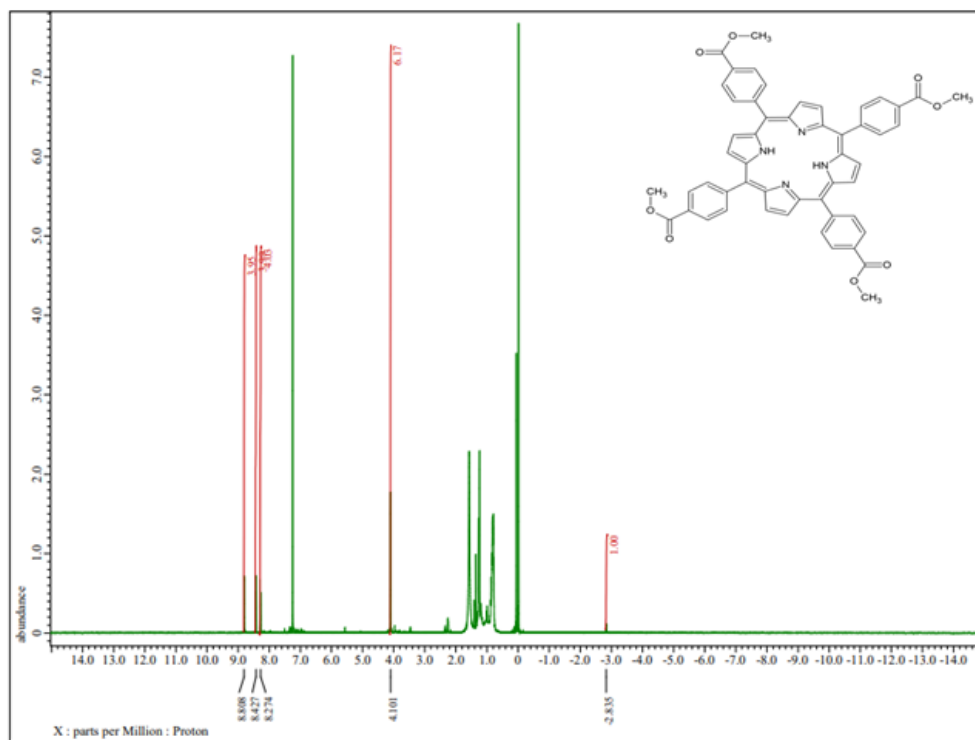

### $^{13}\text{C}$ NMR Spectrum

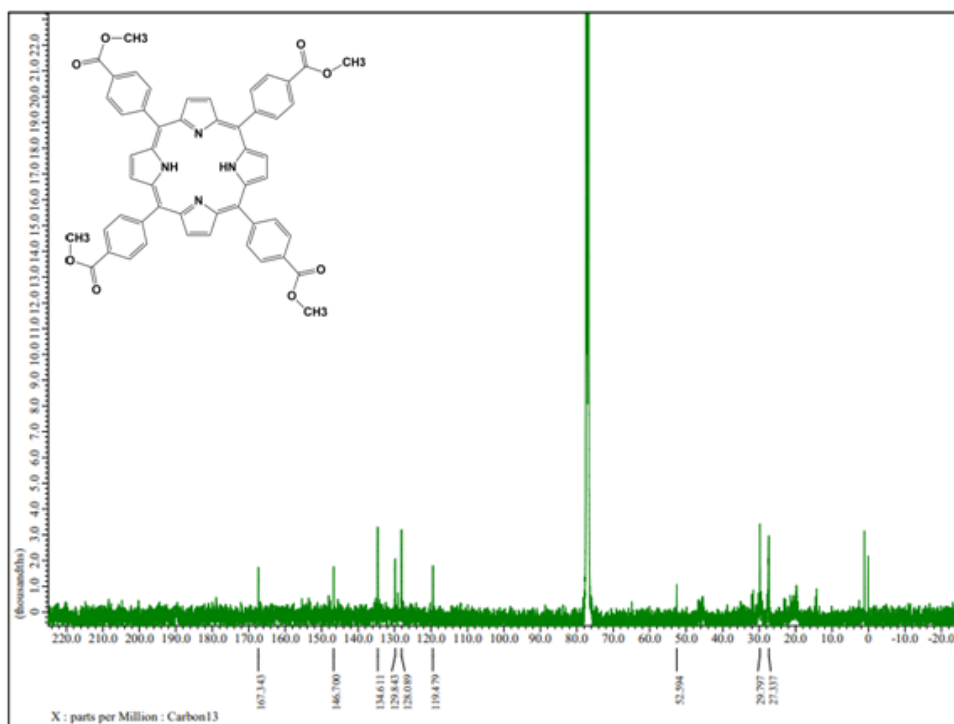

meso-Tetrakis(4-methoxyphenyl)porphyrin:

### $^1\text{H}$ NMR Spectrum

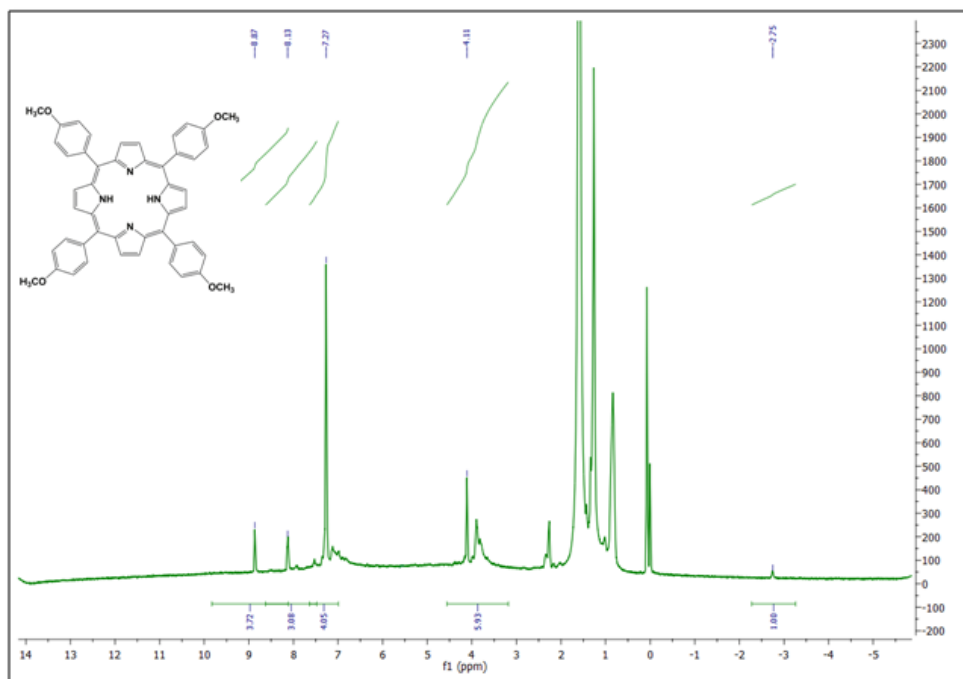

meso-Tetra(4-fluorophenyl)porphyrin:

$^1\text{H}$  NMR Spectrum

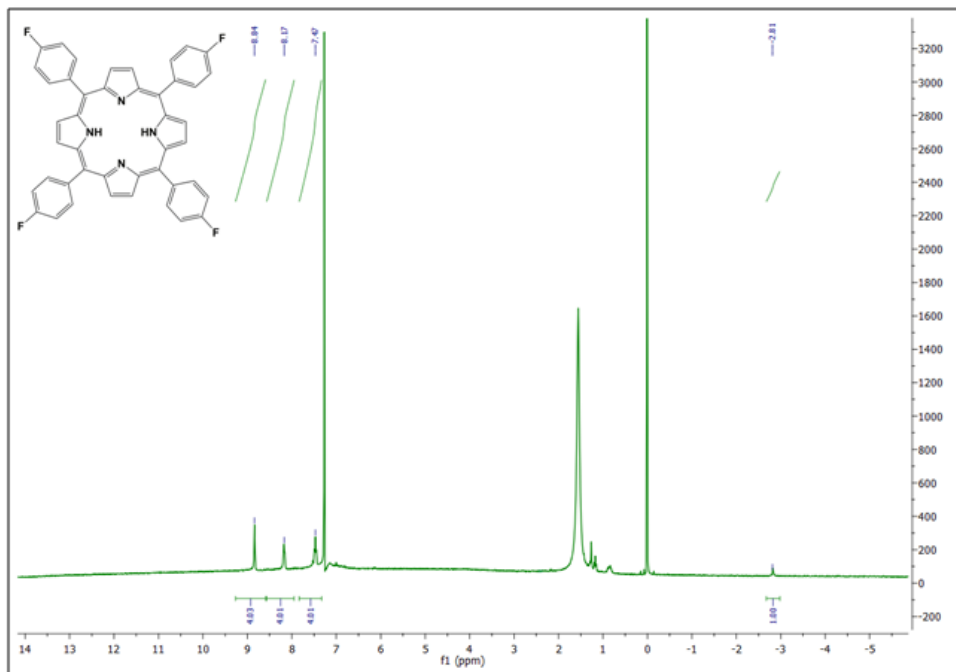

meso-Tetrakis(2,5-dimethylphenyl)porphyrin:

$^1\text{H}$  NMR Spectrum

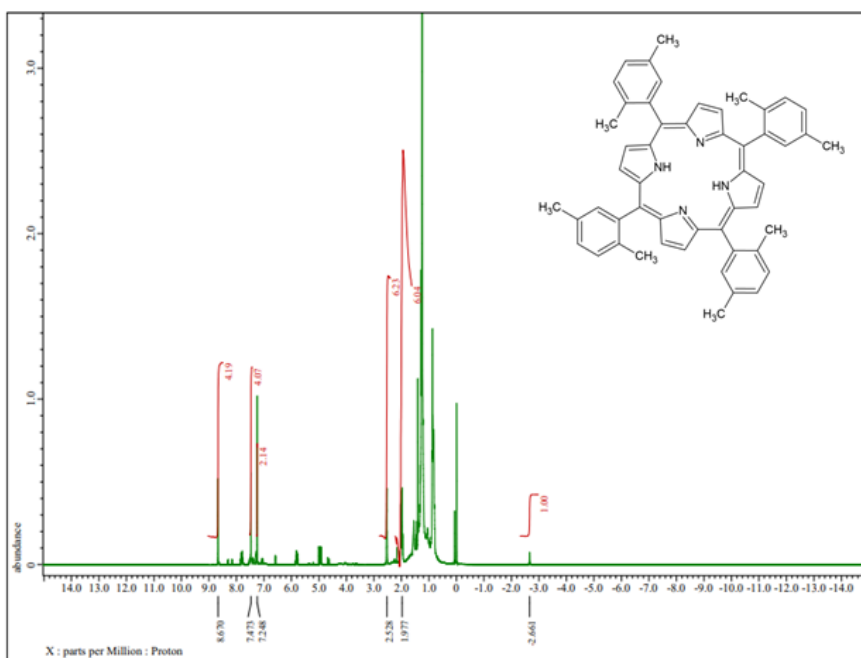



### $^{13}\text{C}$ NMR Spectrum

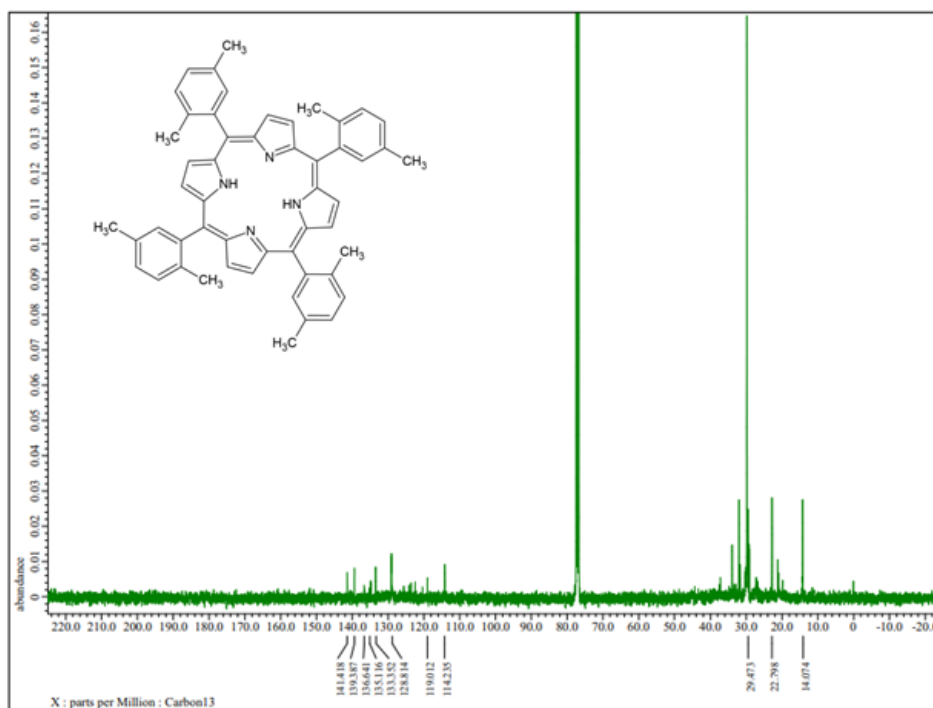

### meso-Tetrakis(4-ethynylphenyl)porphyrin

### $^1\text{H}$ NMR Spectrum

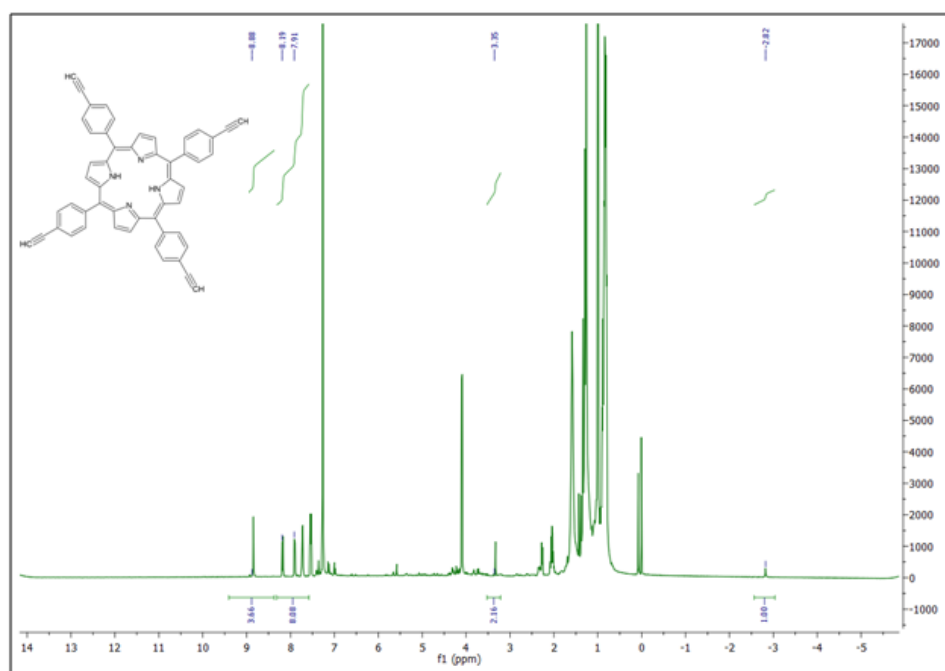

$^{13}\text{C}$  NMR Spectrum

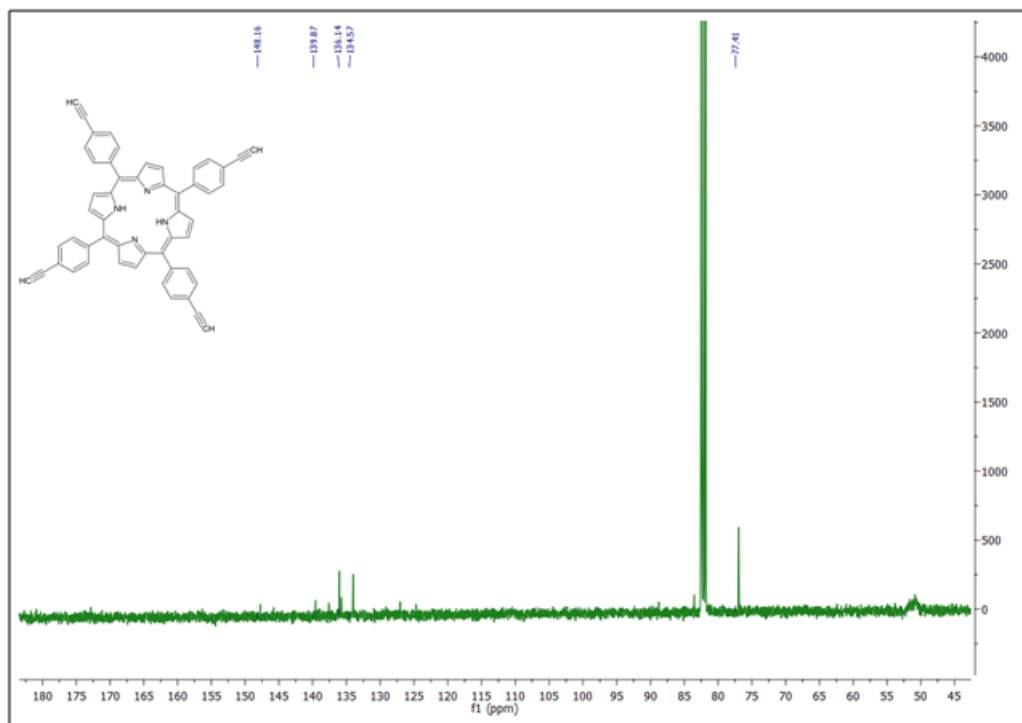

meso-Tetrakis(2-hydroxy-3,5-dichlorophenyl)porphyrin:

$^1\text{H}$  NMR Spectrum

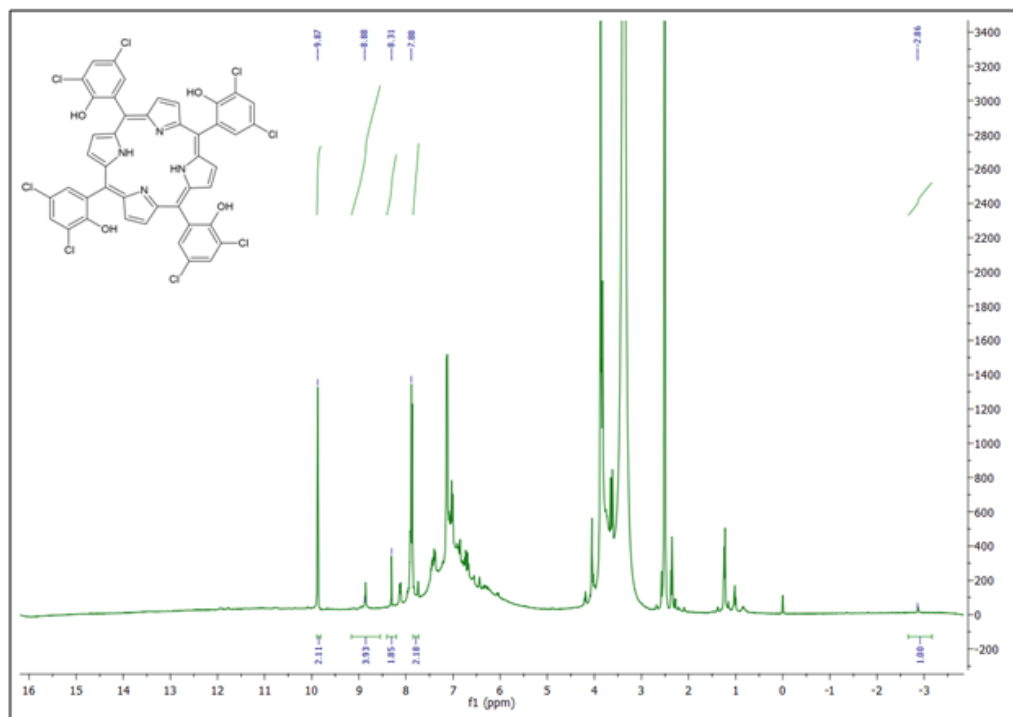

### $^{13}\text{C}$ NMR Spectrum

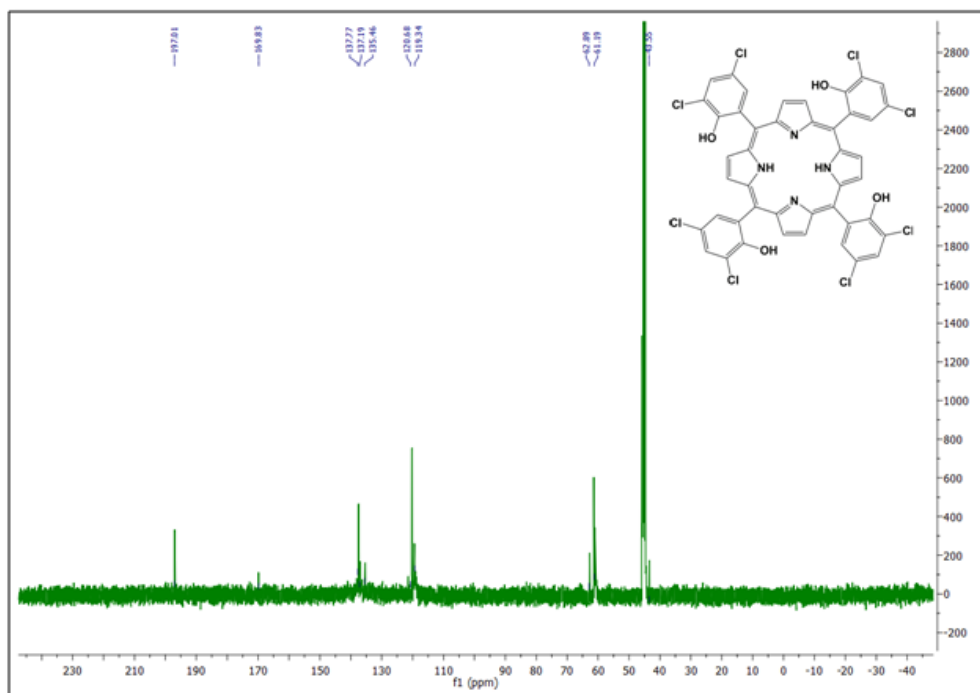

meso-Tetrakis(1-naphthyl)porphyrin:

### $^1\text{H}$ NMR Spectrum

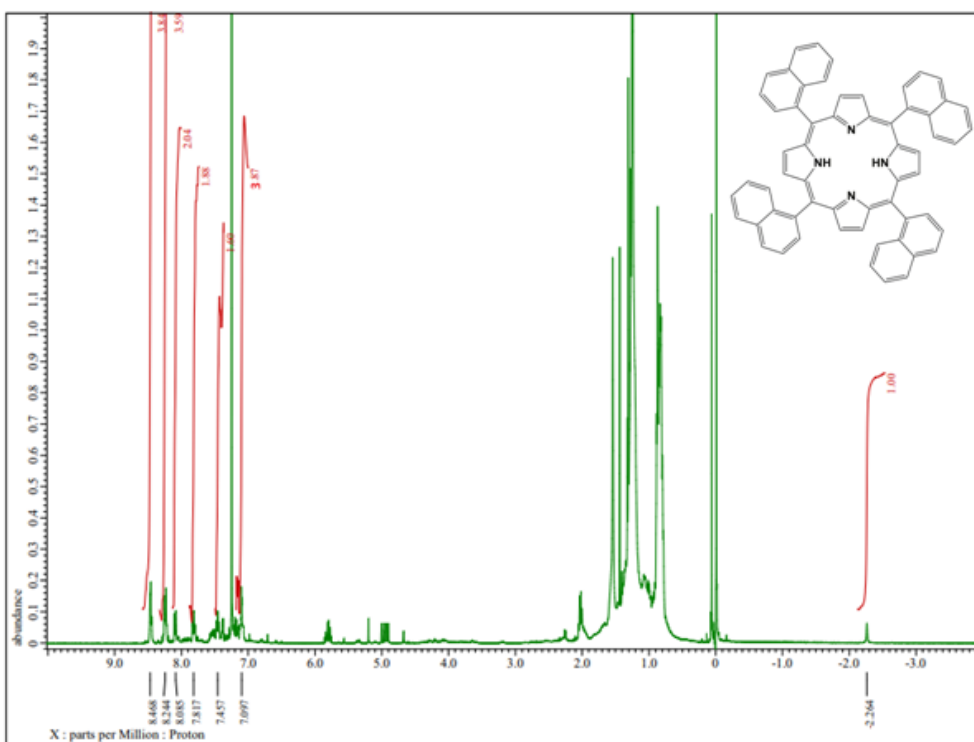

### Reference for supplementary information

1. S. Mondal, T. Pain, K. Sahu and S. Kar, *ACS Omega*, 2021, **6**, 22922–22936
2. D. Mohajer, S. Zakavi, S. Rayati, M. Zahedi, N. Safari, H. R. Khavasi and S. Shahbazian, *New J. Chem.*, 2004, **28**, 1600–1607
3. H. Shy, P. Mackin, A. S. Orvieto, D. Gharbharan, G. R. Peterson, N. Bampos and T. D. Hamilton, *Faraday Discuss.*, 2014, **170**, 59-69.
4. F. E.-Almeida, C. D.-Uribe, W. Vallejo, O. Peña, D. G.-Camargo, A. R. R.Bohórquez, X. Zarate and E. Schott, *Chemical Papers*, 2021, **75**, 4817-4829.
5. H. Yaman and A. Kayan, *J Porphyr Phthalocyanines*, 2017, **21**, 231-237.
6. C. H. da Silveira, E. Garoforo, O. A. Chaves, P. F. B. Gonçalves, L. Streit and B. A. Iglesias, *Inorganica Chimica Acta*, 2018, **482**, 542-553.
